# Supplementary material for: Post-synthetic modification of graphene quantum dots bestows enhanced biosensing and antibiofilm ability: efficiency facet
Source: Royal Society of Chemistry journal article supplement (doi:10.1039/d2ra00494a), 2022-01-01
Supplement: d2ra00494a1.pdf [file d2ra00494a1.pdf]

## Electronic Supplementary Information

### Post synthetic modification of Graphene quantum dots bestowing enhanced bio-sensing and anti-biofilm ability: Efficiency Facet

Neha Agrawal,<sup>\*a</sup> Dolly Bhagel<sup>a</sup>, Priyanka Mishra<sup>b</sup>, Dipti Prasad<sup>a</sup> and Ekta Kohli<sup>\*a</sup>

<sup>a</sup> Department of Neurobiology, DIPAS, DRDO, Delhi, India

<sup>b</sup> Department of Immunology, DIPAS, DRDO, Delhi, India

[\\*neha87bhu@gmail.com](mailto:neha87bhu@gmail.com), [ektakohli@hotmail.com](mailto:ektakohli@hotmail.com)

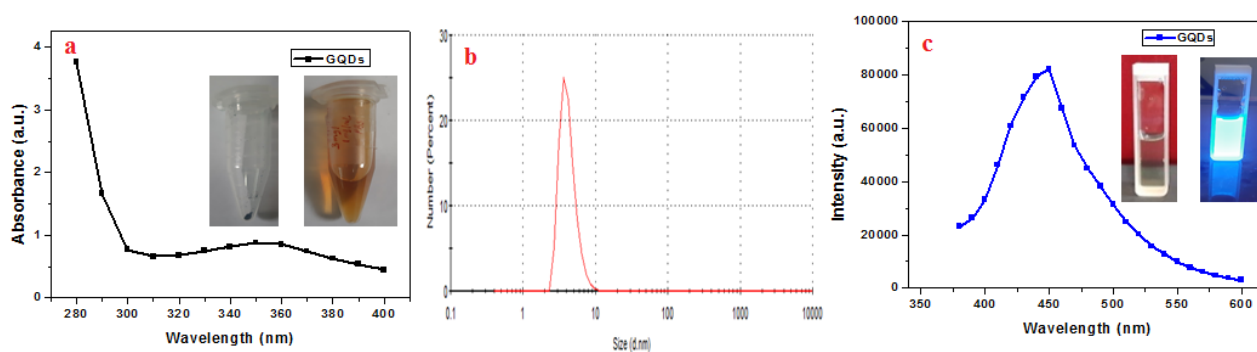

**Figure S1: a) Uv-Visible absorption spectra of unmodified GQDs; b) Size determination of GQDs with DLS spectra; c) Fluorescence spectra of unmodified GQDs excited at 350nm ( inset shows the GQDs solution in normal light and Uv light)**

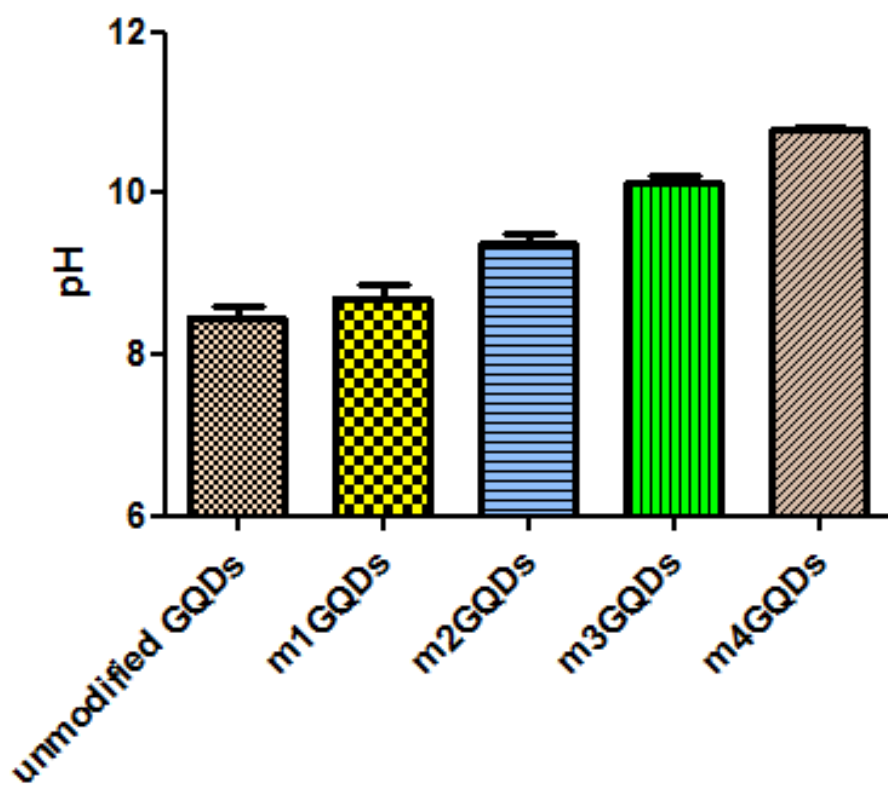

Figure S2: pH variation of unmodified and modified GQDs

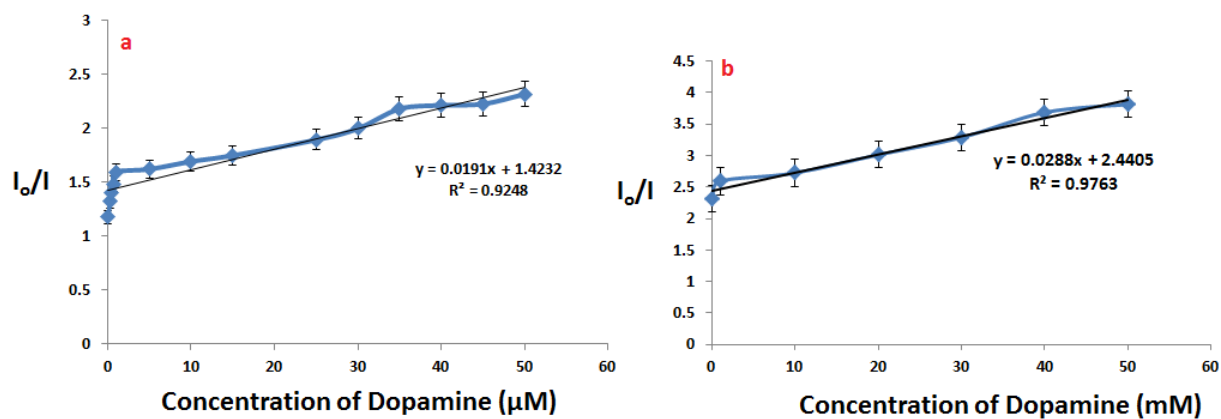

Figure S3: Intensity ratio graph ( $I_0/I$ ) with respect to dopamine concentration a) lower concentration from 0.0625 $\mu\text{M}$  to 50 $\mu\text{M}$  and b) higher concentration from 50 $\mu\text{M}$  to 50mM

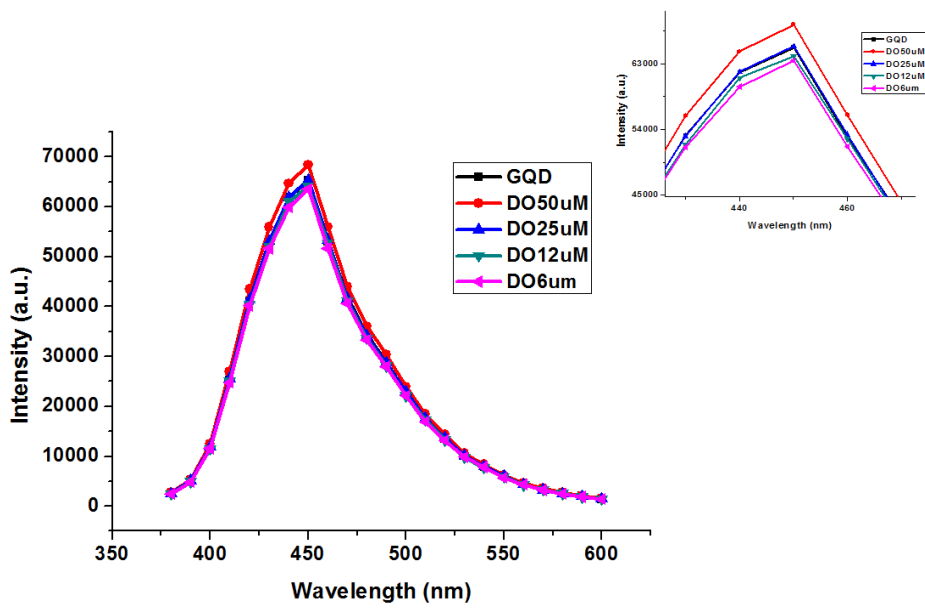

**Figure S4a: Control experiment with unmodified GQDs showing no significant change at lower concentration of dopamine**

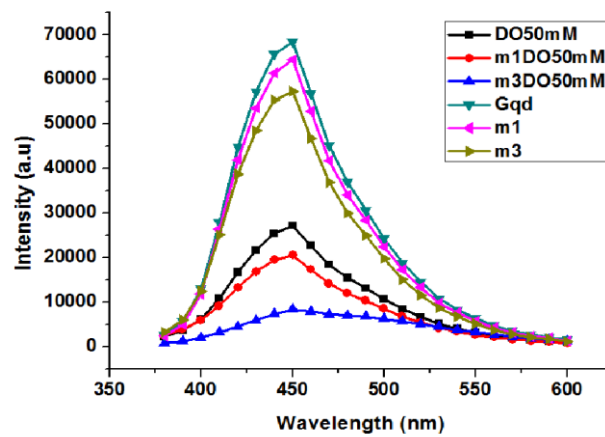

**Figure S4b: Comparison of unmodified (denoted as GQDs) and modified GQDs (m1 for 1:1 modified GQDs, m3 for 1:100 modified GQDs) sensing ability for highest concentration of dopamine at 50mM**

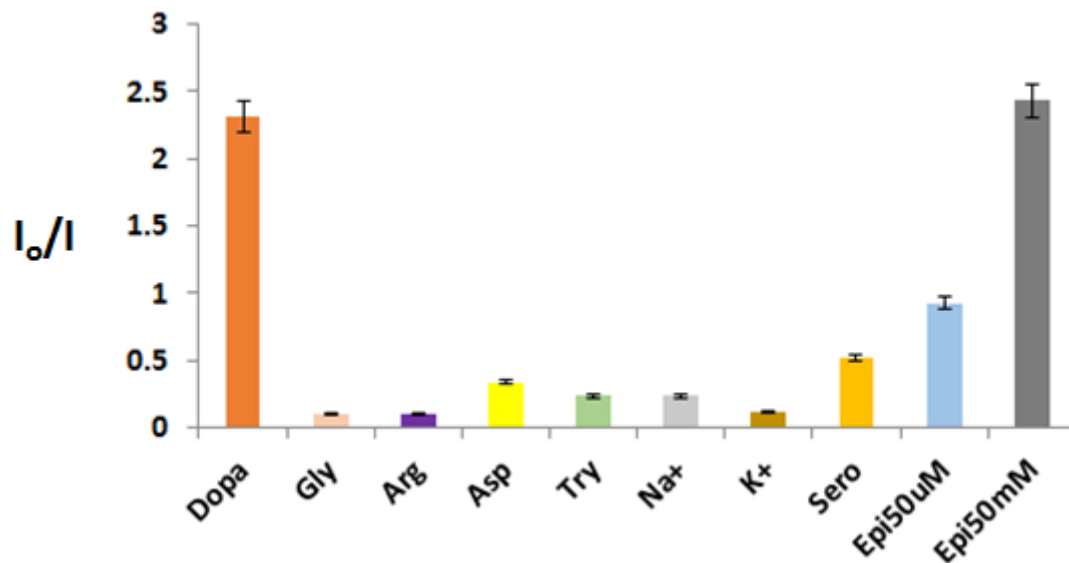

Figure S5: Selectivity of m3GQDs system for amino acid , metal ions and neurotransmitters all at 50uM ; only dark green last epinephrine is 50mM (where Dopamine (Dopa), Glycine (Gly), Arginine (Arg), Aspartic acid (Asp), Tyrosine (Try), Sodium ion(Na+), Potassium ion (K+), Serotonin (Sero), Epinephrine (Epi)

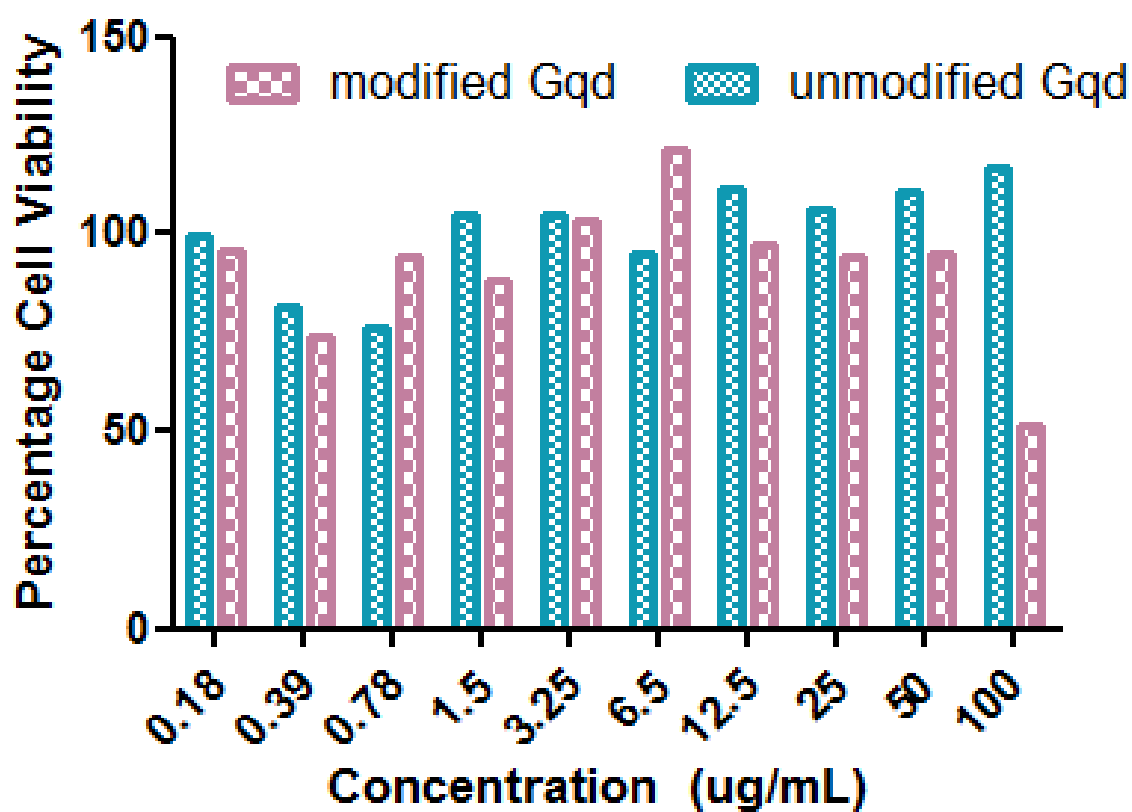

Figure S6: Cell viability assay on C6 (Glioma) cell lines for 24 hour exposure of nanomaterials unmodified GQDs and modified (m3GQDs) GQDs

**Table TS1: D and G band intensity ratio from Raman Spectra**

| S.No. | Sample              | D band Wavenumber (cm <sup>-1</sup> ) | G band Wavenumber (cm <sup>-1</sup> ) | I <sub>D</sub> /I <sub>G</sub> |
|-------|---------------------|---------------------------------------|---------------------------------------|--------------------------------|
| 1     | Unmodified GQDs     | 1308                                  | 1545                                  | 1.03                           |
| 2     | Modified GQDs 1:100 | 1316                                  | 1557                                  | 1.08                           |
